# Supplementary material for: Mild Traumatic Brain Injury in U.S. Soldiers Returning from Iraq
Source: Atypon-hosted journal article supplement (doi:10.1056/nejmoa072972), 2008-01-30
Supplement: nejmoa072972-sa1.pdf [file nejmoa072972-sa1.pdf]

## Supplementary Appendix

This appendix has been provided by the authors to give readers additional information about their work.

Supplement to: Hoge CW, McGurk D, Thomas JL, Cox AL, Engel CC, Castro CA. Mild traumatic brain injury in U.S. soldiers returning from Iraq. *N Engl J Med* 2008;358:453-63. DOI: 10.1056/NEJMoa072972.

**Appendix 1 to 07-2972 for Online Version.**

**Logistic Regression Models with PTSD and Depression as Dependent Variables**

|                                                   | Analyses Including Loss of Consciousness vs. Other Non-TBI Injuries |                                      | Analyses Including Altered Mental Status vs. Other Non-TBI Injuries |                                      |
|---------------------------------------------------|---------------------------------------------------------------------|--------------------------------------|---------------------------------------------------------------------|--------------------------------------|
|                                                   | Adjusted OR (95% CI) for PTSD*                                      | Adjusted OR (95% CI) for Depression† | Adjusted OR (95% CI) for PTSD*                                      | Adjusted OR (95% CI) for Depression† |
| Type of Injury                                    |                                                                     |                                      |                                                                     |                                      |
| LOC or Altered MS                                 | 2.98 (1.70-5.24)                                                    | 3.67 (1.65-8.16)                     | 1.78 (1.13-2.81)                                                    | 1.62 (0.79-3.34)                     |
| Other Injuries                                    | 1.00                                                                | 1.00                                 | 1.00                                                                | 1.00                                 |
| Gender                                            |                                                                     |                                      |                                                                     |                                      |
| Male                                              | 0.66 (.17-2.59)                                                     | 0.98 (0.12-8.36)                     | 0.50 (0.16-1.53)                                                    | 0.63 (0.13-3.04)                     |
| Female                                            | 1.00                                                                | 1.00                                 | 1.00                                                                | 1.00                                 |
| Age                                               |                                                                     |                                      |                                                                     |                                      |
| < 30 Years                                        | 0.75 (0.45-1.25)                                                    | 0.80 (0.40-1.62)                     | 0.93 (0.59-1.47)                                                    | 1.24 (0.61-2.51)                     |
| ≥ 30 Years                                        | 1.00                                                                | 1.00                                 | 1.00                                                                | 1.00                                 |
| Rank                                              |                                                                     |                                      |                                                                     |                                      |
| Junior Enlisted (E1-E4)                           | 1.65 (0.99-2.74)                                                    | 1.35 (0.67-2.73)                     | 1.66 (1.05-2.63)                                                    | 0.95 (0.47-1.90)                     |
| All Higher Ranks                                  | 1.00                                                                | 1.00                                 | 1.00                                                                | 1.00                                 |
| Combat Intensity Score‡                           |                                                                     |                                      |                                                                     |                                      |
| 1 <sup>st</sup> Quartile                          | 1.00                                                                | 1.00                                 | 1.00                                                                | 1.00                                 |
| 2 <sup>nd</sup> Quartile                          | 5.09 (1.36-19.11)                                                   | 2.57 (0.50-13.19)                    | 3.59 (1.22-10.59)                                                   | 2.81 (0.70-11.31)                    |
| 3 <sup>rd</sup> Quartile                          | 5.92 (1.51-23.31)                                                   | 1.40 (0.23-8.44)                     | 3.18 (1.04-9.76)                                                    | 1.84 (0.41-8.22)                     |
| 4 <sup>th</sup> Quartile                          | 11.58 (2.99-44.83)                                                  | 3.87 (0.72-20.83)                    | 6.63 (2.23-19.76)                                                   | 2.84 (0.67-11.97)                    |
| Mechanism of Injury                               |                                                                     |                                      |                                                                     |                                      |
| Blast                                             | 0.96 (0.56-1.63)                                                    | 0.47 (0.21-1.03)                     | 0.94 (0.60-1.49)                                                    | 0.45 (0.21-0.97)                     |
| All Other Mechanisms                              | 1.00                                                                | 1.00                                 | 1.00                                                                | 1.00                                 |
| Improvised explosive device exploded near soldier |                                                                     |                                      |                                                                     |                                      |
| 2 or more occasions                               | 0.55 (0.30-1.00)                                                    | 1.13 (0.45-2.83)                     | 0.63 (0.36-1.10)                                                    | 0.82 (0.35-1.89)                     |
| 0-1 occasion                                      | 1.00                                                                | 1.00                                 | 1.00                                                                | 1.00                                 |
| Hospitalization during deployment, Yes            | 1.31 (.77-2.23)                                                     | 1.87 (0.95-3.69)                     | 0.97 (0.56-1.69)                                                    | 1.09 (0.47-2.55)                     |
| No                                                | 1.00                                                                | 1.00                                 | 1.00                                                                | 1.00                                 |

Abbreviations: LOC= Loss of consciousness, MS = mental status

\* PTSD was measured with the Post-Traumatic Stress Disorder Checklist (PCL) which has a range from 17-85 (higher score indicates greater number and severity of symptoms). The “PTSD” label was used for all individuals who met the psychiatric symptom criteria according to DSM-4 and who had a total PCL score of ≥50.

† Major depression was measured with the Patient Health Questionnaire (PHQ). Subjects had to meet psychiatric criteria according to DSM-4 and report functional impairment at the “very difficult” level.

‡ Combat intensity was measured with a 17 question combat experiences scale with a score range from 0-17 (higher value indicates greater number of different combat experiences).

**Appendix 2 to 07-2972 for Online Version.**

**Logistic Regression Models with High PHQ-15 Score as Dependent Variable**

|                                                                            | OR (95% CI) for high PHQ-15* Physical Symptom Score | OR (95% CI) for high PHQ-15* Physical Symptom Score |
|----------------------------------------------------------------------------|-----------------------------------------------------|-----------------------------------------------------|
|                                                                            | Loss of Consciousness vs. Other Injuries            | Altered Mental Status vs. Other Injuries            |
| Univariate Analysis (Unadjusted)                                           |                                                     |                                                     |
| Type of Injury†                                                            | 2.60 (1.56-4.33)                                    | 1.52 (0.97-2.38)                                    |
| Multivariate, Model 1 (Adjusted ORs and CIs)                               |                                                     |                                                     |
| Type of Injury†                                                            | 0.92 (0.46-1.82)                                    | 1.13 (0.69-1.87)                                    |
| PTSD‡                                                                      | 7.86 (4.09-15.10)                                   | 11.32 (6.88-18.63)                                  |
| Depression§                                                                | 7.47 (3.53-15.78)                                   | NA                                                  |
| Multivariate, Full Model (Adjusted ORs and CIs)                            |                                                     |                                                     |
| Type of Injury†                                                            | 0.76 (0.31-1.84)                                    | 1.31 (0.71-2.41)                                    |
| PTSD‡                                                                      | 8.82 (4.29-18.11)                                   | 10.20 (6.00-17.34)                                  |
| Depression§                                                                | 5.81 (2.62-12.90)                                   | NA                                                  |
| Combat Intensity, 2 <sup>nd</sup> Quartile                                 | 2.54 (0.60-10.79)                                   | 2.19 (0.63-7.62)                                    |
| Combat Intensity, 3 <sup>rd</sup> Quartile                                 | 1.16 (0.24-5.48)                                    | 0.81 (0.21-3.18)                                    |
| Combat Intensity, 4 <sup>th</sup> Quartile                                 | 0.97 (0.21-4.55)                                    | 1.77 (0.50-6.30)                                    |
| Age <30                                                                    | 1.11 (0.55-2.23)                                    | 1.21 (0.66-2.20)                                    |
| Rank, Junior Enlisted                                                      | 1.04 (0.51-2.10)                                    | 1.16 (0.64-2.11)                                    |
| Male Gender                                                                | 0.79 (0.14-4.47)                                    | 0.90 (0.21-3.82)                                    |
| Blast Mechanism of Injury                                                  | 0.95 (0.43-2.08)                                    | 0.46 (0.25-0.87)                                    |
| Improvised Explosive Device exploded near soldier on two or more occasions | 1.98 (0.82-4.73)                                    | 1.52 (0.70-3.28)                                    |
| Hospitalization                                                            | 1.33 (0.62-2.84)                                    | 1.38 (0.69-2.77)                                    |

Note all variables were dichotomized, except for combat intensity, in a manner similar to Appendix 1 table.

\* The PHQ-15 refers to the Patient Health Questionnaire somatic symptom scale (range 0-28 in this study, with higher numbers indicating a greater number and severity of symptoms).

† 2<sup>nd</sup> column of this row shows odds ratio (95% CI) of high PHQ-15 for loss of consciousness vs. other non-TBI injuries, 3<sup>rd</sup> column of this row shows odds ratio (95% CI) of high PHQ-15 for altered mental status vs. other non-TBI injuries

‡ PTSD was measured with the Post-Traumatic Stress Disorder Checklist (PCL) which has a range from 17-85 (higher score indicates greater number of symptoms and severity). The “PTSD” label was used for all individuals who met the psychiatric symptom criteria according to DSM-4 and who had a total PCL score of  $\geq 50$ .

§ Major depression was measured with the Patient Health Questionnaire (PHQ). Subjects had to meet psychiatric criteria according to DSM-4 and report functional impairment at the “very difficult” level.

|| Combat intensity was measured with a 17 question combat experiences scale with a score range from 0-17 (higher value indicates greater number of different combat experiences). The 1<sup>st</sup> (Lowest) Quartile was the reference group.
